# Supplementary material
Source: PubMed Central journal article supplement (PMC4288876)
Supplement: IAI.02682-14_zii999091026so1.pdf [file IAI.02682-14_zii999091026so1.pdf]

Supplemental Figure 1

**A**

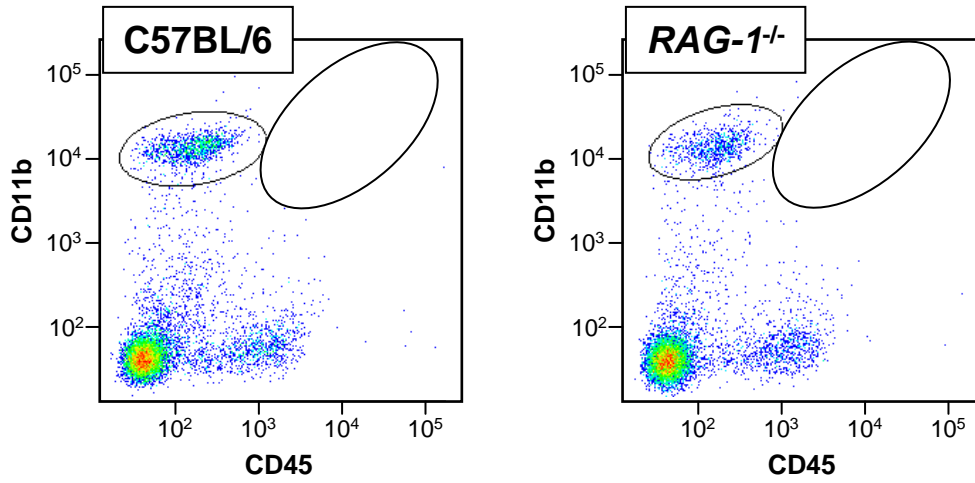

**B**

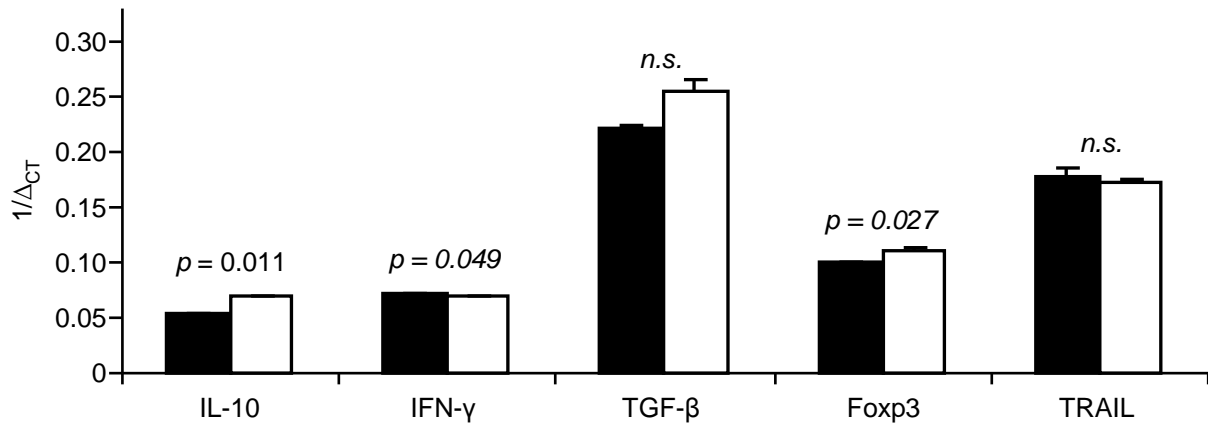

## Supplemental Figure 2

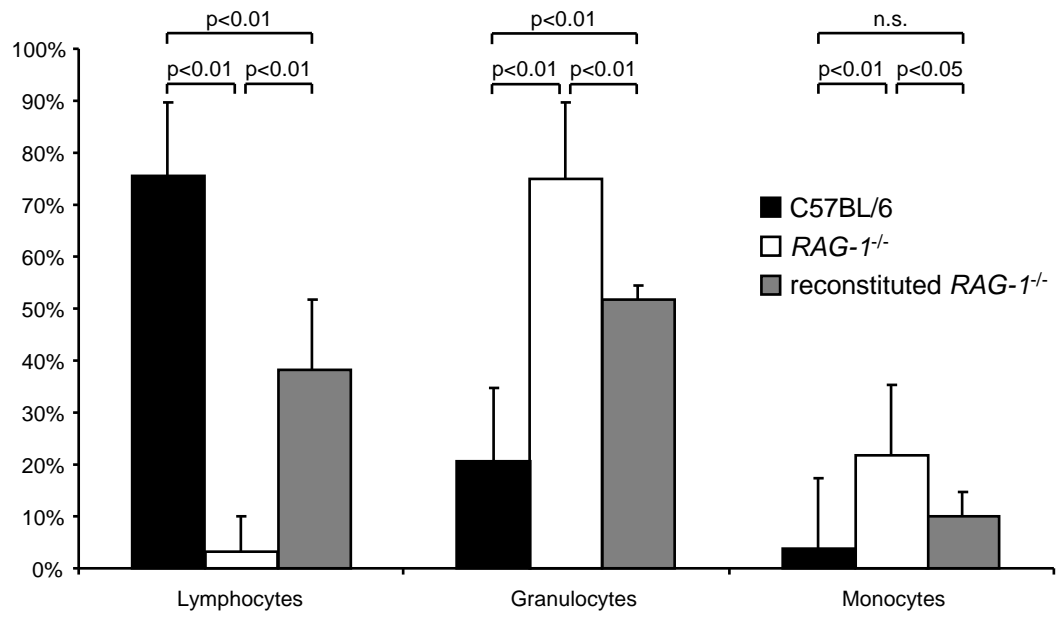

1 Supplemental Fig. 1. Comparison of the CNS environment in treatment-naïve wild type C57BL/6 and  
2 RAG-1-deficient mice. (A) Characterization of myeloid cells in the brain parenchyma using flow  
3 cytometry. Delineation of CD11b<sup>+</sup>CD45<sup>low</sup> detectable microglia and inflammatory  
4 CD11b<sup>+</sup>CD45<sup>high</sup> microglia (absent). (B) Quantitative real-time PCR of interleukin (IL)-10,  
5 interferon gamma (IFN- $\gamma$ ), transforming growth factor beta (TGF- $\beta$ ), forkhead box P3 (Foxp3)  
6 and tumor necrosis factor alpha-related ligand (TRAIL) mRNAs in cerebellar tissue lysates of  
7 C57BL/6 mice (closed bars) and RAG-1-deficient mice (open bars). Expression for both  
8 genotypes is depicted as 1/ $\Delta$ CT using hypoxanthin-guanine-phosphoribosyl-transferase as the  
9 reference housekeeping gene. Significance was determined using Student's t test.

10 Supplemental Fig. 2. Relative frequency of white blood cells in central venous blood of C57BL/6 wild  
11 type *versus* RAG-1-deficient mice and efficiency of peripheral lymphocyte reconstitution. For  
12 reconstitution, T and B lymphocytes were obtained from the spleens of C57BL/6 mice using  
13 positive selection (MACS magnetic cell sorting). RAG-1-deficient mice were injected  
14 intravenously with  $1.5 \times 10^7$  lymphocytes 24 h prior to assessment. Manual differential counts  
15 were performed following lysis of erythrocytes and staining with Türk's solution. Significance  
16 was determined by Kruskal-Wallis ANOVA followed by Mann-Whitney-U tests using Holm's  
17 Bonferroni adjustment for multiple niveaus.
